# Supplementary material for: Key Dimensions for the Prevention and Control of Communicable Diseases in Institutional Settings: A Scoping Review to Guide the Development of a Tool to Strengthen Preparedness at Migrant Holding Centres in the EU/EEA
Source: Int J Environ Res Public Health. 2018 May 30;15(6):1120. doi: 10.3390/ijerph15061120 (PMC6024975; doi:10.3390/ijerph15061120)
Supplement: Supplementary file 1 [file ijerph-15-01120-s001.xlsx]

## Sheet: First Objective N 55
Database/Repository/Search Engine	Search String	Authors (Last, Initials)/Source	Article Title	Language	Journal/Source	Year	Country/Source	Setting	Study/Report	Type of Study	Type of intervention	Type of outcome	Type of exposure	Type of exposure group	Human resources	Medicines and vaccines	Sanitation and disinfection (incl isolation/distancing)	Physical infrastructures	Overcrowding
PubMED	1	Parry, J; Duggal, H; Beaumont, M; Jenkinson, H; Price, C	A report of an outbreak of Shigellosis in a primary school in Staffordshire.	eng	Public Health	2001	UK	School	Study	Outbreak investigation	Outbreak control	Needs identification for ID prevention and Control	Shigella	GI	Yes	No	Yes	Yes	No
PubMED	1	Lee, MB; Greig, JD	A review of gastrointestinal outbreaks in schools: effective infection control interventions.	eng	J Sch Health	2010	Canada	School	Study	Review	Outbreak control	Needs identification for ID prevention and Control	GI illness (51% bacterial, 40% viral, 7% cryptosporidium, 2% multiple). Most frequent norovirus, E coli, Shigella, Salmonella, HepA	GI	No	No	Yes	No	No
PubMED	1	Basu, S; Stuckler, D; McKee, M	Addressing institutional amplifiers in the dynamics and control of tuberculosis epidemics.	eng	Am J Trop Med Hyg	2011	US, UK	Multiple	Study	Mathematical modeling of control strategies	Preparedness	Needs identification for ID prevention and Control	TB	H2H	No	No	No	Yes	Yes
PubMED	1	Tsalik, EL; Cunningham, CK; Cunningham, HM; Lopez-Marti, MG; Sangvai, DG; Purdy, WK; Anderson, DJ; Thompson, JR; Brown, M; Woods, CW; Jaggers, LB; Hendershot, EF	An Infection Control Program for a 2009 influenza A H1N1 outbreak in a university-based summer camp.	eng	J Am Coll Health	2011	US	University	Study	Outbreak investigation	Outbreak control	Needs identification for ID prevention and Control	Influenza	H2H	No	No	Yes	No	No
PubMED	1	Wolfe, MI; Xu, F; Patel, P; O'Cain, M; Schillinger, JA; St Louis, ME; Finelli, L	An outbreak of syphilis in Alabama prisons: correctional health policy and communicable disease control.	eng	Am J Public Health	2001	US	Correctional Facilities	Study	Outbreak investigation	Outbreak control	Needs identification for ID prevention and Control	Syphilis	STD	No	No	No	Yes	No
PubMED	1	Leung, J; Lopez, AS; Tootell, E; Baumrind, N; Mohle-Boetani, J; Leistikow, B; Harriman, KH; Preas, CP; Cosentino, G; Bialek, SR; Marin, M	Challenges with controlling varicella in prison settings: experience of California, 2010 to 2011.	eng	J Correct Health Care	2014	US	Correctional Facilities	Study	Outbreak investigation	Outbreak control	Needs identification for ID prevention and Control	Varicella	H2H	No	No	No	Yes	No
PubMED	1	Elias, AF; Chaussee, MS; McDowell, EJ; Huntington, MK	Community-based intervention to manage an outbreak of MRSA skin infections in a county jail.	eng	J Correct Health Care	2010	US	Correctional Facilities	Study	Outbreak investigation	Outbreak control	Needs identification for ID prevention and Control	MRSA	Skin	No	No	Yes	No	No
PubMED	1	Jongcherdchootrakul, K; Henderson, AK; Iamsirithaworn, S; Modchang, C; Siriarayapon, P	First pandemic A (H1N1) pdm09 outbreak in a private school, Bangkok, Thailand, June 2009.	eng	J Med Assoc Thai	2014	Thailand	School	Study	Outbreak investigation	Outbreak control	Needs identification for ID prevention and Control	Influenza	H2H	No	No	Yes	Yes	Yes
PubMED	1	Crum, NF; Wallace, MR; Lamb, CR; Conlin, AM; Amundson, DE; Olson, PE; Ryan, MA; Robinson, TJ; Gray, GC; Earhart, KC	Halting a pneumococcal pneumonia outbreak among United States Marine Corps trainees.	eng	Am J Prev Med	2003	US, Egypt	Defence Forces	Study	Outbreak investigation	Outbreak control	Needs identification for ID prevention and Control	Pneumococcal Pneumonia	H2H	No	Yes	Yes	Yes	Yes
PubMED	1	Wohl, DA; Rosen, D; Kaplan, AH	HIV and incarceration: dual epidemics.	eng	AIDS Read	2006	US	Correctional Facilities	Study	Review	Situation Analysis	Needs identification for ID prevention and Control	HIV	BBV/STD	No	Yes	No	No	No
PubMED	1	Hellard, ME; Aitken, CK	HIV in prison: what are the risks and what can be done?	eng	Sex Health	2004	Australia	Correctional Facilities	Study	Review	Situation Analysis	Needs identification for ID prevention and Control	BBV	BBV	No	Yes	Yes	No	No
PubMED	1	Guthrie, JA; Lokuge, KM; Levy, MH	Influenza control can be achieved in a custodial setting: pandemic (H1N1) 2009 and 2011 in an Australian prison.	eng	Public Health	2012	Australia	Correctional Facilities	Study	Survey	Outbreak control	Needs identification for ID prevention and Control	Influenza	H2H	No	No	Yes	Yes	No
PubMED	1	Awofeso, N; Fennell, M; Waliuzzaman, Z; O'Connor, C; Pittam, D; Boonwaat, L; de Kantzow, S; Rawlinson, WD	Influenza outbreak in a correctional facility.	eng	Aust N Z J Public Health	2001	Australia	Correctional Facilities	Study	Outbreak investigation	Outbreak control	Needs identification for ID prevention and Control	Influenza	H2H	No	Yes	No	No	No
PubMED	1	MMWR 2012	Influenza outbreaks at two correctional facilities -- Maine, March 2011.	eng	MMWR Morb Mortal Wkly Rep	2012	US	Correctional Facilities	Study	Outbreak investigation	Outbreak control	Needs identification for ID prevention and Control	Influenza	H2H	No	Yes	No	No	No
PubMED	1	Kadlubowski, M; Wasko, I; Klarowicz, A; Hryniewicz, W	Invasive meningococcal disease at a military base in Warsaw, January 2007.	eng	Euro Surveill	2007	Poland	Defence Forces	Study	Outbreak investigation	Outbreak control	Needs identification for ID prevention and Control	Meningogoccal disease	H2H	No	Yes	No	No	No
PubMED	1	Asiedu-Bekoe, F; Adu, DA; Offei, A	Mass oseltamivir prophylaxis halts pandemic influenza A H1N1 2009 outbreak in a secondary school in Ashanti Region, Ghana.	eng	Ghana Med J	2012	Ghana	School	Study	Outbreak investigation	Outbreak control	Needs identification for ID prevention and Control	Influenza	H2H	No	Yes	Yes	No	Yes
PubMED	1	Kay, D; Roche, M; Atkinson, J; Lamden, K; Vivancos, R	Mumps outbreaks in four universities in the North West of England: prevention, detection and response.	eng	Vaccine	2011	UK	University	Study	Outbreak investigation	Outbreak control	Needs identification for ID prevention and Control	Mumps	H2H	No	No	No	No	No
PubMED	1	MMWR 2012	Outbreak of meningococcal disease associated with an elementary school -- Oklahoma, March 2010.	eng	MMWR Morb Mortal Wkly Rep	2012	US	School	Study	Outbreak investigation	Outbreak control	Needs identification for ID prevention and Control	Meningogoccal disease	H2H	No	Yes	Yes	No	No
PubMED	1	Aasheim, ET; Inns, T; Trindall, A; Emmett, L; Brown, KE; Williams, CJ; Reacher, M	Outbreak of mumps in a school setting, United Kingdom, 2013.	eng	Hum Vaccin Immunother	2014	UK	School	Study	Outbreak investigation	Outbreak control	Needs identification for ID prevention and Control	Mumps	H2H	No	Yes	No	No	No
PubMED	1	Fang, Y; Zhang, L; Tu, C; Ye, D; Fontaine, R; Ma, H; Hao, J; Fu, L; Ying, X; Chen, Q; Wang, Y; Liu, H; Zhu, BP	Outbreak of pulmonary tuberculosis in a Chinese high school, 2009-2010.	eng	J Epidemiol	2013	China	School	Study	Outbreak investigation	Outbreak control	Needs identification for ID prevention and Control	Tuberculosis	H2H	No	Yes	No	No	Yes
PubMED	1	Valin, N; Antoun, F; Chouaïd, C; Renard, M; Dautzenberg, B; Lalande, V; Ayache, B; Morin, P; Sougakoff, W; Thiolet, JM; Truffot-Pernot, C; Jarlier, V; Decludt, B	Outbreak of tuberculosis in a migrants' shelter, Paris, France, 2002.	eng	Int J Tuberc Lung Dis	2005	France	Migrant hosting facility	Study	Outbreak investigation	Outbreak control	Needs identification for ID prevention and Control	Tuberculosis	H2H	No	Yes	No	No	Yes
PubMED	1	Matthews, E; Armstrong, G; Spencer, T	Pertussis infection in a baccalaureate nursing program: clinical implications, emerging issues, and recommendations.	eng	J Contin Educ Nurs	2008	US	University	Study	Outbreak investigation	Outbreak control	Needs identification for ID prevention and Control	Pertussis	H2H	No	Yes	No	No	Yes
PubMED	1	Levy, MH; Quilty, S; Young, LC; Hunt, W; Matthews, R; Robertson, PW	Pox in the docks: varicella outbreak in an Australian prison system.	eng	Public Health	2003	Australia	Correctional Facilities	Study	Outbreak investigation	Outbreak control	Needs identification for ID prevention and Control	Varicella	H2H	No	No	Yes	Yes	Yes
PubMED	1	Round, A; Evans, MR; Salmon, RL; Hosein, IK; Mukerjee, AK; Smith, RW; Palmer, SR	Public health management of an outbreak of group C meningococcal disease in university campus residents.	eng	Eur J Public Health	2001	UK	University	Study	Outbreak investigation	Outbreak control	Needs identification for ID prevention and Control	Meningogoccal disease	H2H	No	Yes	Yes	No	No
PubMED	1	Greig, JD; Lee, MB; Harris, JE	Review of enteric outbreaks in prisons: effective infection control interventions.	eng	Public Health	2011	Canada	Correctional Facilities	Study	Review	Outbreak control	Needs identification for ID prevention and Control	Enteric outbreaks	GI	Yes	No	Yes	Yes	Yes
PubMED	1	Michino, H; Otsuki, K	Risk factors in causing outbreaks of food-borne illness originating in schoollunch facilities in Japan.	eng	J Vet Med Sci	2000	Japan	School	Study	Review	Outbreak control	Needs identification for ID prevention and Control	Food borne illness	GI	No	No	Yes	No	No
PubMED	1	MMWR 2004	School-associated pertussis outbreak--Yavapai County, Arizona, September 2002-February 2003.	eng	MMWR Morb Mortal Wkly Rep	2004	US	School	Study	Outbreak investigation	Outbreak control	Needs identification for ID prevention and Control	Pertussis	H2H	No	Yes	Yes	No	No
PubMED	1	Arinaminpathy, N; Raphaely, N; Saldana, L; Hodgekiss, C; Dandridge, J; Knox, K; McCarthy, ND	Transmission and control in an institutional pandemic influenza A(H1N1) 2009 outbreak.	eng	Epidemiol Infect	2012	US, UK	School	Study	Outbreak investigation	Outbreak control	Needs identification for ID prevention and Control	Influenza	H2H	Yes	Yes	Yes	No	No
PubMED	1	Parvez, FM; Lobato, MN; Greifinger, RB	Tuberculosis control: lessons for outbreak preparedness in correctional facilities.	eng	J Correct Health Care	2010	US	Correctional Facilities	Study	Preparedness planning	Preparedness	Needs identification for ID prevention and Control	Tuberculosis	H2H	Yes	No	No	Yes	No
PubMED	1	Harwood, JL; LaVan, JT; Brand, GJ	Two aircraft carriers’ perspectives: a comparative of control measures in shipboard H1N1 outbreaks.	eng	Disaster Med Public Health Prep	2013	US	Ships	Study	Outbreak investigation	Outbreak control	Needs identification for ID prevention and Control	Influenza	H2H	No	Yes	Yes	No	No
PubMED	1	Miller, JR; Short, VL; Wu, HM; Waller, K; Mead, P; Kahn, E; Bahn, BA; Dale, JW; Nasrullah, M; Walton, SE; Urdaneta, V; Ostroff, S; Averhoff, F	Use of nonpharmaceutical interventions to reduce transmission of 2009 pandemic influenza A (pH1N1) in Pennsylvania public schools.	eng	J Sch Health	2013	US	School	Study	Outbreak investigation	Outbreak control	Needs identification for ID prevention and Control	Influenza	H2H	No	No	Yes	No	No
PubMED	1	Haas, EJ; Dukhan, L; Goldstein, L; Lyandres, M; Gdalevich, M	Use of vaccination in a large outbreak of primary varicella in a detention setting for African immigrants.	eng	Int Health	2014	Israel	Migrant hosting facility	Study	Outbreak investigation	Outbreak control	Needs identification for ID prevention and Control	Varicella	H2H	No	Yes	Yes	Yes	Yes
PubMED	2	Schwartz, RD	The impact of correctional institutions on public health during a pandemic or emerging infection disaster.	eng	Am J Disaster Med	2008	US	Correctional Facilities	Study	Review	Situation Analysis	Needs identification for ID prevention and Control	Communicable diseases with a focus on pandemic preparedness	Multiple	No	Yes	Yes	Yes	Yes
PubMED	3	Zalumas, JC; Rose, CD	Hepatitis C and HIV in incarcerated populations: fights, bites, searches, and syringes!	eng	J Assoc Nurses AIDS Care	2003	US	Correctional Facilities	Study	Review	Situation Analysis	Needs identification for ID prevention and Control	HIV, HCV	BBV/STD	Yes	No	No	No	No
PubMED	3	Fleming, EB; LeBlanc, TT; Reid, LC	The status of HIV prevention efforts for women in correctional facilities.	eng	J Womens Health (Larchmt)	2013	US	Correctional Facilities	Study	Review	Situation Analysis	Needs identification for ID prevention and Control	HIV	BBV/STD	NA	NA	NA	NA	No
NA	NA	ECDC	Expert opinion on the public health needs of irregular migrants, refugees or asylum seekers across the EU's southern and south-eastern borders	eng	ECDC, 2015	2015	ECDC	Migrant hosting facility	Report	Situation Analysis		Needs identification for ID prevention and Control	Multiple	Multiple	NA	Yes	Yes	Yes	Yes
NA	NA	ECDC	Mission Report: Increased influx of migrants at the Greek-Turkish border	eng	ECDC, 2011	2011	ECDC	Migrant hosting facility	Report	Situation Analysis		Risk assessment	Multiple	Multiple	No	No	Yes	Yes	Yes
NA	NA	MSF	Al di la del muro Viaggio nei centri per migrant in Italia	eng	MSF. 2010	2010	MSF	Migrant hosting facility	Report	Situation Analysis		Needs identification and tool application	Multiple	Multiple	Yes	No	Yes	Yes	Yes
NA	NA	WHO	Health Needs Assessment Malta	eng	WHO, 2012	2011	WHO	Migrant hosting facility	Report	Situation Analysis		Needs identification and tool application	Multiple	Multiple	Yes	No	No	No	No
NA	NA	WHO	Health Needs Assessment Lampedusa	eng	WHO, 2011	2011	WHO	Migrant hosting facility	Report	Situation Analysis		Needs identification for ID prevention and Control	Multiple	Multiple	Yes	No	Yes	No	Yes
NA	NA	WHO	Health Needs Assessment Lampedusa, Linosa	eng	WHO, 2012	2012	WHO	Migrant hosting facility	Report	Situation Analysis		Needs identification for ID prevention and Control	Multiple	Multiple	Yes	Yes	Yes	Yes	No
NA	NA	WHO	Assessing health-system capacity to manage sudden large influxes of migrants Sicily, Italy	eng	WHO, 2014	2014	WHO	Migrant hosting facility	Report	Situation Analysis		Needs identification and tool application	Multiple	Multiple	No	No	Yes	Yes	Yes
NA	NA	WHO	Assessing health-system capacity to manage sudden large influxes of migrants Cyprus	eng	WHO, 2015	2015	WHO	Migrant hosting facility	Report	Situation Analysis		Needs identification and tool application	Multiple	Multiple	Yes	No	No	No	No
NA	NA	WHO	Assessing health-system capacity to manage sudden large influxes of migrants Serbia	eng	WHO, 2015	2015	WHO	Migrant hosting facility	Report	Situation Analysis		Needs identification and tool application	Multiple	Multiple	Yes	Yes	Yes	Yes	Yes
NA	NA	WHO	Assessing health-system capacity to manage sudden large influxes of migrants Bulgaria	eng	WHO 2015	2015	WHO	Migrant hosting facility	Report	Situation Analysis		Needs identification and tool application	Multiple	Multiple	Yes	No	Yes	Yes	NA
NA	NA	WHO	Assessing health-system capacity to manage sudden large influxes of migrants Portugal	eng	WHO, 2014	2014	WHO	Migrant hosting facility	Report	Situation Analysis		Needs identification and tool application	Multiple	Multiple	No	No	No	No	No
NA	NA	WHO	Assessing health-system capacity to manage sudden large influxes of migrants Greece	eng	WHO 2015	2015	WHO	Migrant hosting facility	Report	Situation Analysis		Needs identification and tool application	Multiple	Multiple	Yes	Yes	No	No	Yes
NA	NA	WHO	Assessing health-system capacity to manage sudden large influxes of migrants Malta	eng	WHO, 2015	2015	WHO	Migrant hosting facility	Report	Situation Analysis		Needs identification and tool application	Multiple	Multiple	Yes	No	No	No	Yes
NA	NA	IOM	EquiHealth assessment Report Bulgaria	eng	IOM, 2015	2015	IOM	Migrant hosting facility	Report	Situation Analysis		Needs identification for ID prevention and Control	Multiple	Multiple	Yes	Yes	No	Yes	No
NA	NA	IOM	EquiHealth assessment Report Croatia	eng	IOM, 2014	2014	IOM	Migrant hosting facility	Report	Situation Analysis		Needs identification for ID prevention and Control	Multiple	Multiple	Yes	NA	Yes	Yes	NA
NA	NA	IOM	EquiHealth assessment Report Greece	eng	IOM, 2013	2013	IOM	Migrant hosting facility	Report	Situation Analysis		Needs identification for ID prevention and Control	Multiple	Multiple	Yes	Yes	Yes	Yes	Yes
NA	NA	IOM	EquiHealth assessment Report Italy	eng	IOM, 2013	2013	IOM	Migrant hosting facility	Report	Situation Analysis		Needs identification for ID prevention and Control	Multiple	Multiple	Yes	NA	Yes	Yes	Yes
NA	NA	IOM	EquiHealth assessment Report Malta	eng	IOM, 2013	2013	IOM	Migrant hosting facility	Report	Situation Analysis		Needs identification for ID prevention and Control	Multiple	Multiple	Yes	Yes	Yes	Yes	Yes
NA	NA	IOM	EquiHealth assessment Report Spain	eng	IOM, 2013	2013	IOM	Migrant hosting facility	Report	Situation Analysis		Needs identification for ID prevention and Control	Multiple	Multiple	Yes	NA	NA	Yes	Yes
NA	NA	WHO	United Nations interagency health-needs-assessment mission, Southern Turkey	eng	WHO, 2012	2012	WHO	Migrant hosting facility	Report	Situation Analysis		Needs identification and tool application	Multiple	Multiple	No	No	No	No	Yes

## Sheet: Second objective N 42
N	Database/Repository/Search Engine	Search String	Authors (Last, Initials)/Source	Article Title	Language	Journal	Year	Duplicate	Screening Relevance/Pertinence	Country	Setting	Study/Report	Type of Study	Eligibility Relevance/Pertinence	Type of intervention	Type of outcome	Type of exposure	Type of exposure group
1	PubMED	1	Awofisayo, A; Ibbotson, S; Smith, GE; Janmohamed, K; Mohamed, H; Olowokure, B	Challenges and lessons learned from implementing a risk-based approach to school advice and closure during the containment phase of the 2009 influenza pandemic in the West Midlands, England.	eng	Public Health	2013	No	Yes	UK	School	Study	Risk assessment tool to guide school closures	Yes	Tools	Tools for needs assessments	Influenza	H2H
1	PubMED	1	Bonačić Marinović, AA; Swaan, C; Wichmann, O; van Steenbergen, J; Kretzschmar, M	Effectiveness and timing of vaccination during school measles outbreak.	eng	Emerg Infect Dis	2012	No	Yes	Netherlands, Germany	School	Study	Mathematical modeling of control strategies	Yes	Preparedness	Tools for preparedness	Measles	H2H
1	PubMED	1	Spaulding, AC; McCallum, VA; Walker, D; Reeves, A; Drenzek, C; Lewis, S; Bailey, E; Buehler, JW; Spotts Whitney, EA; Berkelman, RL	How public health and prisons can partner for pandemic influenza preparedness: a report from Georgia.	eng	J Correct Health Care	2009	No	Yes	US	Correctional Facilities	Study	Training	Yes	Preparedness	Tools for preparedness	Influenza	H2H
1	PubMED	1	Beaton, R; Stergachis, A; Thompson, J; Osaki, C; Johnson, C; Charvat, SJ; Marsden-Haug, N	Pandemic policy and planning considerations for universities: findings from a tabletop exercise.	eng	Biosecur Bioterror	2007	No	Yes	US	University	Study	Tabletop excercise	Yes	Preparedness	Tools for preparedness	Influenza	H2H
1	PubMED	1	Tiwari, A; Tarrant, M; Yuen, KH; Chan, S; Kagan, S; Ching, P; Wong, A; Wong, SS	Preparedness for influenza pandemic in Hong Kong nursing units.	eng	J Nurs Scholarsh	2006	No	Yes	Cina	Nursing training and hospital institutions	Study	Preparedness planning tool application	Yes	Preparedness	Tools for preparedness	Influenza	H2H
1	PubMED	1	van't Hoff, G; Fedosejeva, R; Mihailescu, L	Prisons' preparedness for pandemic flu and the ethical issues.	eng	Public Health	2009	No	Yes	Netherlands, Latvia, Romania	Correctional Facilities	Study	Preparedness planning	Yes	Preparedness	Tools for preparedness	Influenza	H2H
1	PubMED	1	Morris, JG; Greenspan, A; Howell, K; Gargano, LM; Mitchell, J; Jones, JL; Potter, M; Isakov, A; Woods, C; Hughes, JM	Southeastern Center for Emerging Biologic Threats tabletop exercise: foodborne toxoplasmosis outbreak on college campuses.	eng	Biosecur Bioterror	2012	No	Yes	US	University	Study	Tabletop excercise	Yes	Preparedness	Tools for preparedness	Toxoplasmosi	GI
1	PubMED	1	Rebmann, T; Elliott, MB; Reddick, D; D Swick, Z	US school/academic institution disaster and pandemic preparedness and seasonal influenza vaccination among school nurses.	eng	Am J Infect Control	2012	No	Yes	US	School/University	Study	Preparedness planning	Yes	Preparedness	Tools for preparedness	Communicable diseases with a focus on pandemic preparedness	Multiple
1	NA	NA	ECDC	Risk of importation and spread of malaria and other vector-borne diseases associated with the influx of migrants in the EU	eng	NA	2015	No	Yes	EU		Report			Preparedness	Risk assessment	Vector borne diseases
1	NA	NA	ECDC	Outline for initial migrant health assessment,at point of entry to the European Union (not public)	eng	NA	2011	No	Yes	EU		Report			Guidance/Best Practices-clinical health assessment	Needs identification for ID prevention and Control	Multiple
1	NA	NA	MSF	Rapid Health Assessment of refugee or displaced populations	eng	NA	2006	No	Yes	NA		Report			Tools	Tools for needs assessments	Multiple
1	NA	NA	MSF	Rapporto di Medici Senza Frontiere Pozzallo	ita	NA	2015	No	Yes	Italy		Report			Review	Needs identification for ID prevention and Control	Multiple
1	NA	NA	WHO	Hospital emergency response checklist	eng	NA	2011	No	Yes	NA		Report			Tools	Tools for preparedness	Multiple
1	NA	NA	WHO	Toolkit for assessing health-system capacity for crisis management	eng	NA	2012	No	Yes	NA		Report			Tools	Tools for needs assessments	All hazard
1	NA	NA	WHO	Assessment tool for core capacity requirements at designated airports, ports and ground crossings	eng	NA	2009	No	Yes	NA		Report			Tools	Tools for needs assessments	All hazard
1	NA	NA	WHO	Public health aspects of migrant health: a review of the evidence on health status for refugees and asylum seekers in the European Region	eng	NA	2015	No	Yes	WHO EURO		Report			Review	Other	Multiple
1	NA	NA	WHO	Public health aspects of migrant health: a review of the evidence on health status for undocumented migrants in the European Region (2015)	eng	NA	2015	No	Yes	WHO EURO		Report			Review	Other	Multiple
1	NA	NA	UNHCR	Handbook for Emergencies	eng	NA	2007	No	Yes	NA		Report			Guidance/Best Practices- other	Tools for preparedness	Multiple
1	NA	NA	Red Cross	Manuale di Buone Pratiche Esperienze da un Centro di Accoglienza per Richiedenti Asilo	eng	NA	2010	No	Yes	Italy		Report			Guidance/Best Practices- other	Other	Multiple
1	NA	NA	OSCE	Self-assessment tool for nations to increase preparedness for cross-border implications of crises	eng	NA	2013	No	Yes	NA		Report			Tools	Tools for preparedness	All hazard
1	NA	NA	CoE	Visiting immigration detention centres A guide for parliamentarians	eng	NA	2013	No	Yes	EU		Report			Tools	Needs identification and tool application	Multiple
1	NA	NA	UK	Managing meningococcal disease (septicaemia or meningitis) in higher education institutions	eng	NA	2004	No	Yes	UK		Report			Guidance/Best Practices- other	Other	Meningococcal disease
1	NA	NA	Ireland	Infectious Disease Assessment for Migrants	eng	NA	2015	No	Yes	Ireland		Report			Guidance/Best Practices-clinical health assessment	Other	Multiple
1	NA	NA	Italy	Schema di capitolato di appalto per la gestione dei centri di accoglienza per immigrati; specifiche tecniche al capitolato; allegato al capitolato di appalto per la gestione dei centri di permanenza temporanea e assistenza e per i centri di accoglienza	ita	NA	2015	No	Yes	Italy		Report			Protocol/contract	Other	Multiple
1	NA	NA	Italy	Raccomandazioni per la gestione di problematiche sanitarie connesse con l’afflusso di migranti sulle piccole isole (MOH)	ita	NA	2012	No	Yes	Italy		Report			Guidance/Best Practices- other	Other	Multiple
1	NA	NA	Italy	Linee di indirizzo per gli interventi del Servizio Sanitario Nazionale a tutela della salute dei detenuti e degli internati negli istituti penitenziari, e dei minorenni sottoposti a provvedimento penale (MoH, MoJ)	ita	NA	NA	No	Yes	Italy		Report			Guidance/Best Practices- other	Other	Multiple
1	NA	NA	Italy	Piano di contingenza sanitario Regionale Migranti (Sicily)	ita	NA	2014	No	Yes	Italy		Report			Protocol/contract	Tools for preparedness	Multiple
1	NA	NA	Italy	Linee di indirizzo per la organizzazione dei servizi sanitari in concomitanza di uno sbarco di migranti (Sicily)	ita	NA	2014	No	Yes	Italy		Report			Guidance/Best Practices- other	Tools for preparedness	Multiple
1	NA	NA	Italy	Protocollo operativo per il controllo delle malattie infettive e la profilassi immunitaria in relazione all’afflusso di immigrati (Veneto)	ita	NA	2014	No	Yes	Italy		Report			Protocol/contract	Other	Multiple
1	NA	NA	Italy	Sicurezza alimentare e igiene nei campi di prima accoglienza (Veneto)	ita	NA	2011	No	Yes	Italy		Report			Guidance/Best Practices- other	Other	food security
1	NA	NA	Italy	Manuale operativo per l’attivazione e la gestione di servizi di accoglienza e integrazione per richiedenti asilo, rifugiati e beneficiari di protezione umanitaria (Piemonte)	ita	NA	NA	No	Yes	Italy		Report			Guidance/Best Practices- other	Other	Multiple
1	NA	NA	Italy	Accoglienza Profughi e Richiedenti Asilo Note e requisiti per l’organizzazione del servizio di Accoglienza in Valle Camonica (Lombardia)	ita	NA	NA	No	Yes	Italy		Report			Guidance/Best Practices-clinical health assessment	Tools for needs assessments	Multiple
1	NA	NA	Australia	Standards for health services in Australian immigration detention centres	eng	NA	2007	No	Yes	Australia		Report			Guidance/Best Practices- other	Tools for needs assessments	Multiple
1	NA	NA	USA	Guideline for Isolation Precautions: Preventing Transmission of Infectious Agents in Healthcare Settings (CDC)	eng	NA	2007	No	Yes	USA		Report			Guidance/Best Practices- other	Tools for preparedness	Multiple
1	NA	NA	UNHCR	UNHCR, Shelter needs assessment	eng	NA	2014	No	Yes	NA		Report			Guidance/Best Practices- other	Tools for preparedness	Multiple
1	NA	NA	USA	Guidelines for the U.S. Domestic Medical Examination for Newly Arriving Refugees	eng	NA	2014	No	Yes	USA		Report			Guidance/Best Practices-clinical health assessment	Other	Multiple
1	NA	NA	IOM	Guidelines for border management and detention procedures involving migrants: a public health perspective	eng	NA	2010	No	Yes	NA		Report			Guidance/Best Practices- other	Tools for preparedness	Multiple
1	NA	NA	Canada	Evidence-based clinical guidelines for immigrants and refugees	eng	NA	2011	No	Yes	Canada		Report			Guidance/Best Practices-clinical health assessment	Other	Multiple
1	NA	NA	UK	Health and Justice Health Needs Assessment Toolkit for Prescribed Places of Detention	eng	NA	2014	No	Yes	UK		Report			Tools	Needs identification and tool application	Multiple
1	NA	NA	UNODC	HIV in prisons: Situation and needs assessment toolkit	eng	NA	2010	No	Yes	NA		Report			Tools	Needs identification and tool application	HIV
1	NA	NA	IOM/EC	Health assessment of refugees and migrants in the EU/EEA	eng	NA	2015	No	Yes	EU		Report			Guidance/Best Practices-clinical health assessment	Other	Multiple
1	NA	NA	WHO	Toolkit for assessing health system capacity to manage large influxes of refugees and migrants in the acute phase	eng	NA	2015	No	Yes	NA		Report			Tools	Tools for preparedness	Multiple
